# Supplementary material for: Iron “Ore” Nothing: Benthic iron fluxes from the oxygen-deficient Santa Barbara Basin enhance phytoplankton productivity in surface waters
Source: Copernicus journal article supplement (doi:10.5194/bg-2022-237), 2022-12-14

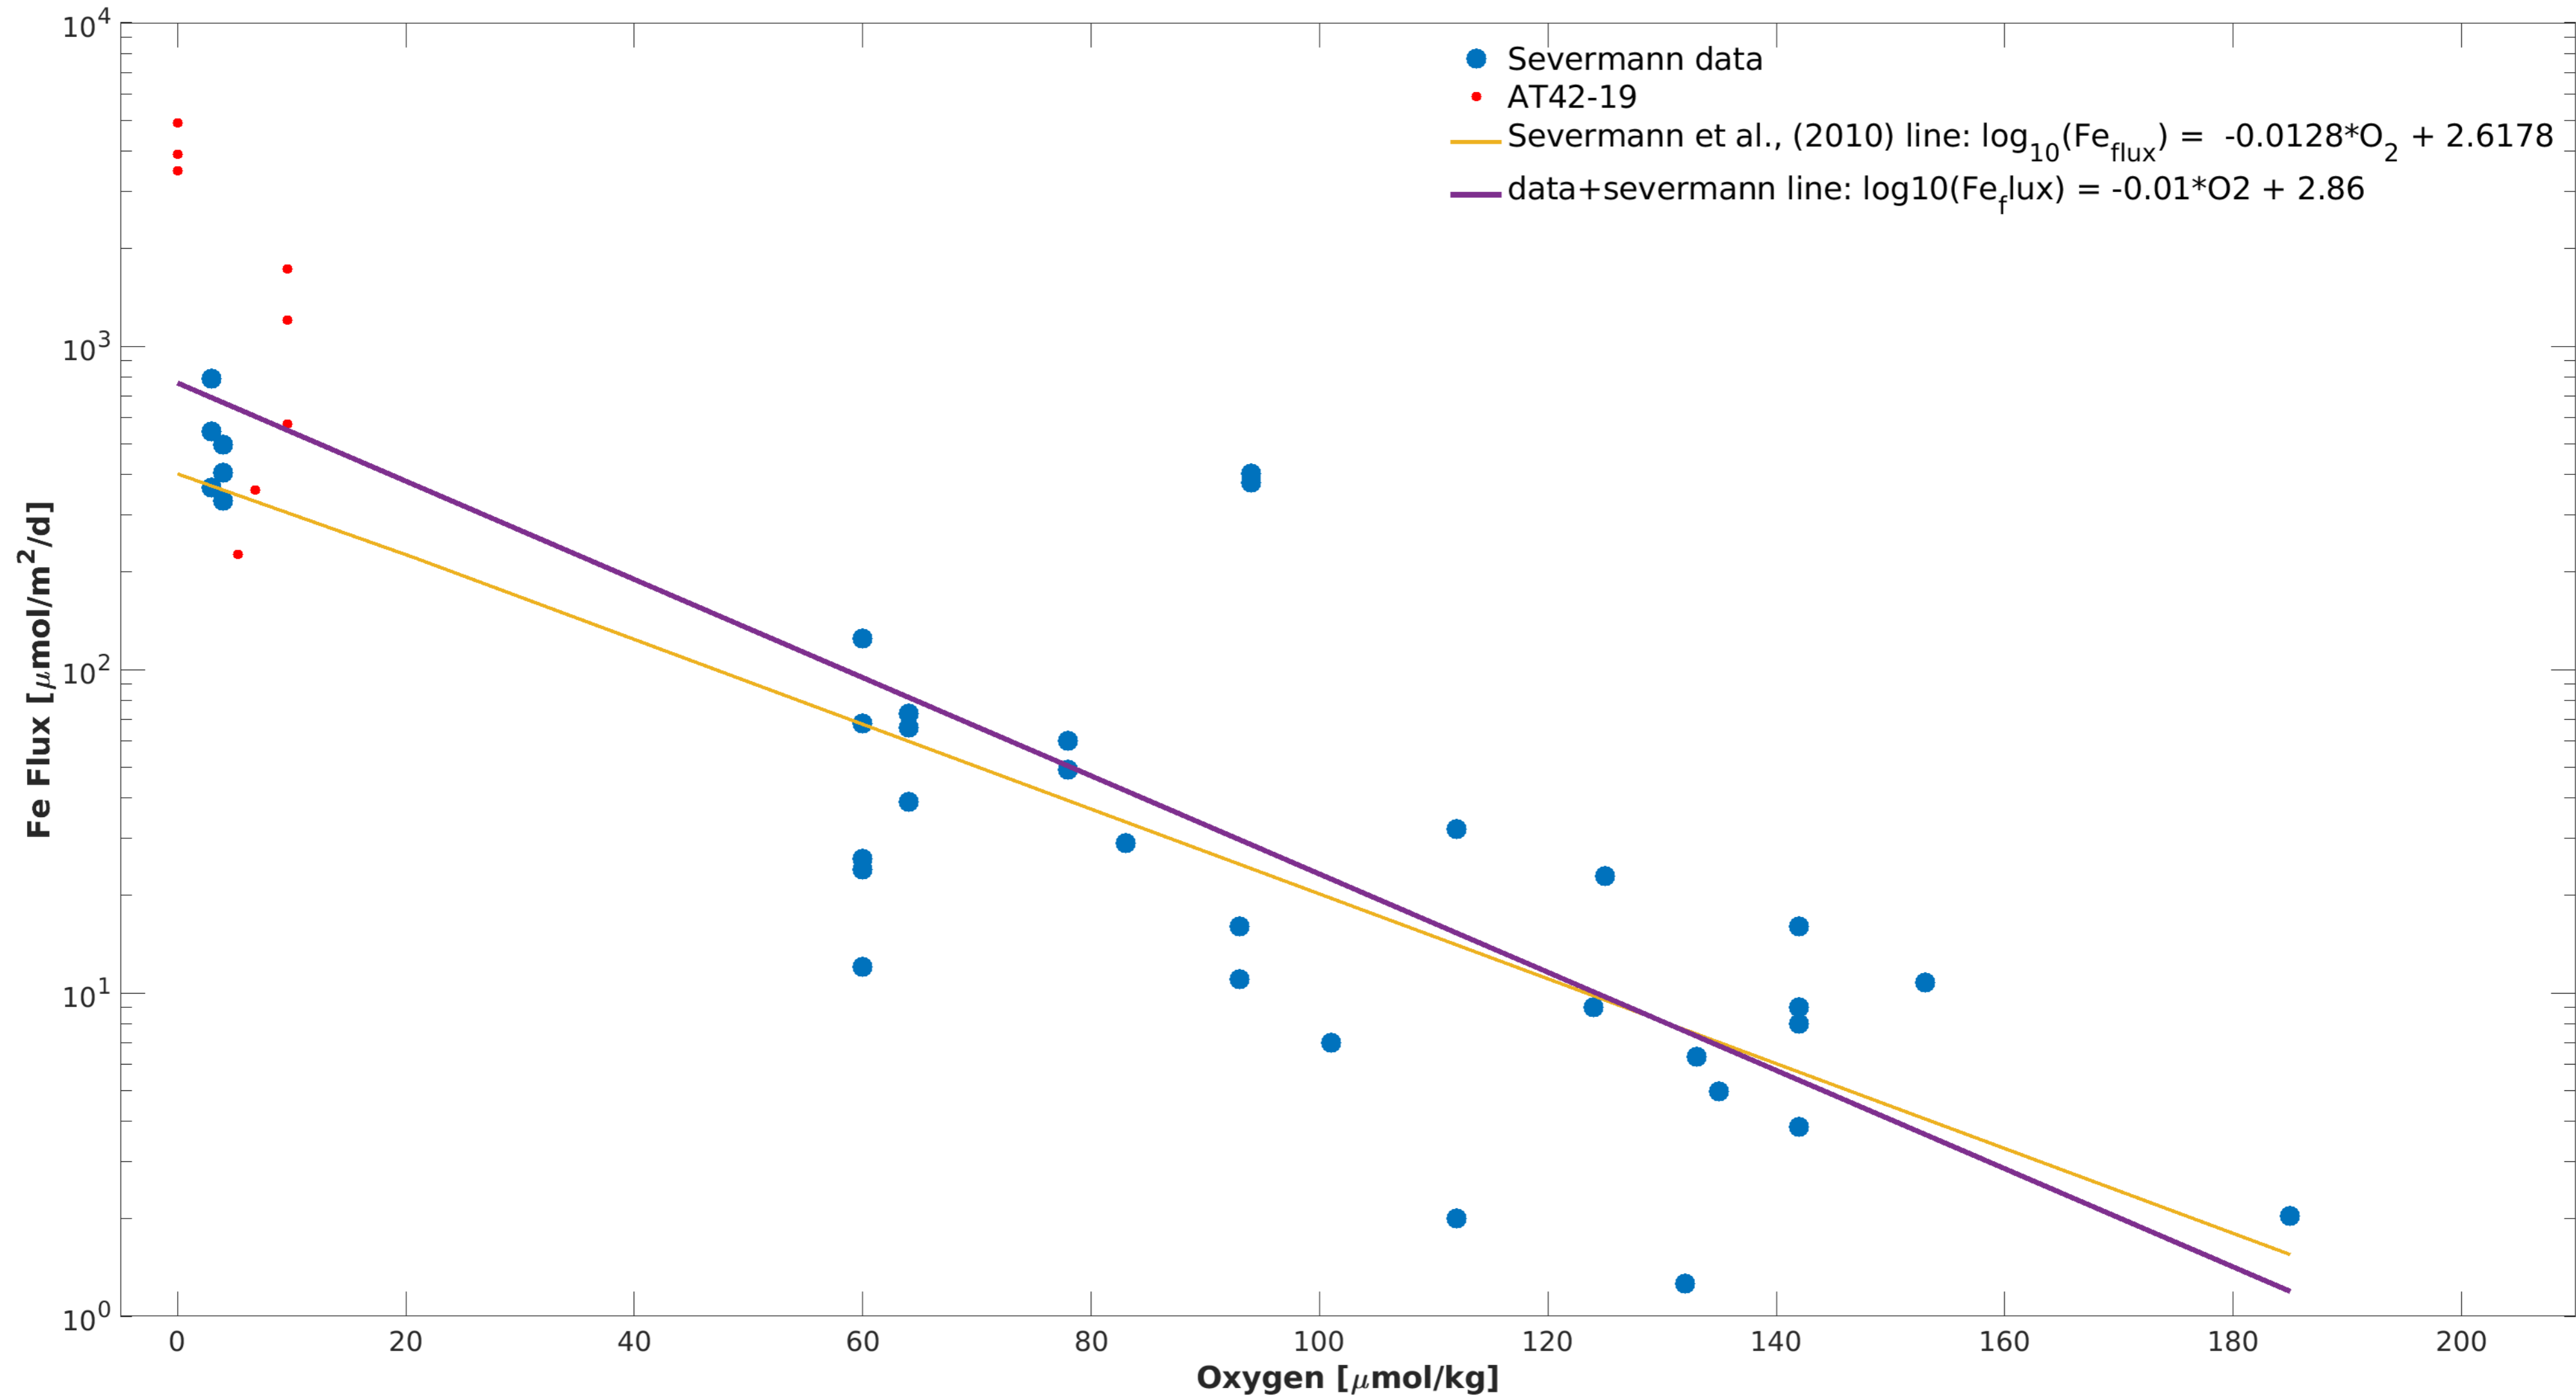

Supplement: Supplementary file [file bg-2022-237-AC3-supplement.pdf]
